# Supplementary material for: Chronic use of tramadol after acute pain episode: cohort study
Source: PubMed Central journal article supplement — BMJ. 2019 May 14;365:l1849. doi: 10.1136/bmj.l1849 (PMC6514531; doi:10.1136/bmj.l1849), 2019-05-14
Supplement: thic048304.ww1.pdf [file thic048304.ww1.pdf]

## Supplemental Appendices

### Appendix A: Comparison of OLDW and US under 65 privately insured population, 2015

|                        | US privately insured | OLDW<br>commercial |
|------------------------|----------------------|--------------------|
| <b>Race/ethnicity</b>  |                      |                    |
| White                  | 66%                  | 70%                |
| Asian                  | 7%                   | 6%                 |
| Hispanic               | 15%                  | 14%                |
| Black                  | 11%                  | 11%                |
| American Indian        | 1%                   | N/A                |
| Female                 | 50%                  | 49%                |
| <b>Age</b>             |                      |                    |
| 0 to 17                | 24%                  | 22%                |
| 18 to 24               | 11%                  | 11%                |
| 25 to 34               | 16%                  | 18%                |
| 35 to 44               | 15%                  | 17%                |
| 45 to 54               | 17%                  | 18%                |
| 55 to 59               | 9%                   | 8%                 |
| 60 to 64               | 7%                   | 6%                 |
| <b>Census Division</b> |                      |                    |
| New England            | 5%                   | 3%                 |
| Mid Atlantic           | 13%                  | 7%                 |
| East North Central     | 15%                  | 16%                |
| West North Central     | 6%                   | 11%                |
| South Atlantic         | 20%                  | 22%                |
| East South Central     | 6%                   | 4%                 |
| West South Central     | 12%                  | 18%                |
| Mountain               | 7%                   | 10%                |
| Pacific                | 16%                  | 9%                 |

OLDW commercial includes people with both medical and prescription coverage; excludes people with unknown race/ethnicity, year of birth, or sex

Source: CPS ASEC (Current Population Survey—Annual Social and Economic Supplement), data for 2015, using <https://www.census.gov/cps/data/cpstablecreator.html>; Includes only people listed with a single race. Hispanic includes people of any single race who indicated they were of Hispanic origin

Comparison of OLDW and US Medicare Advantage population, 2015

|                    | US Medicare Advantage | OLDW Medicare Advantage |
|--------------------|-----------------------|-------------------------|
| Race/ethnicity     |                       |                         |
| White              | 76%                   | 76%                     |
| Black              | 11%                   | 12%                     |
| Hispanic           | 8%                    | 9%                      |
| Other              | 6%                    | 3%                      |
| Female             | 55%                   | 57%                     |
| Census Division    |                       |                         |
| New England        | 3%                    | 6%                      |
| Mid Atlantic       | 15%                   | 15%                     |
| East North Central | 15%                   | 18%                     |
| West North Central | 6%                    | 12%                     |
| South Atlantic     | 20%                   | 31%                     |
| East South Central | 6%                    | 5%                      |
| West South Central | 10%                   | 4%                      |
| Mountain           | 7%                    | 5%                      |
| Pacific            | 18%                   | 3%                      |

OLDW Medicare Advantage includes people with both medical and prescription coverage; excludes people with unknown race/ethnicity or sex  
 US Medicare Advantage source: Kaiser Family Foundation, 2015 data  
<https://www.kff.org/state-category/medicare/medicare-advantage/>

## Appendix B

**Anesthesia procedures:** All anesthesia CPT codes except codes between 99141 and 99157

(procedural sedation codes)

**Included opioids:** buprenorphine, butorphanol, codeine, dihydrocodeine, fentanyl, hydrocodone, hydromorphone, levomethadyl, levorphanol, meperidine, methadone, morphine, opium, oxycodone, oxymorphone, pentazocine, tapentadol, tramadol.

**Excluded procedures:** Includes procedure codes observed on the same date as one of our surgeries and determined to be a separate unrelated procedure beyond the scope of the primary operation. Excluded CPT codes include:

1. **Carpal tunnel release:** 10060, 11010, 11011, 11012, 11043, 11044, 11308, 11311, 11312, 11313, 11400, 11403, 11421, 11422, 11423, 11600, 11602, 11621, 11622, 11624, 11626, 11719, 11740, 11755, 11760, 11762, 11765, 11900, 11960, 12001, 12004, 12005, 12006, 12011, 12013, 12014, 12020, 12032, 12044, 12046, 12052, 13121, 13122, 13131, 14020, 14060, 14350, 15002, 15003, 15004, 15100, 15120, 15130, 15170, 15220, 15221, 15240, 15274, 15430, 15574, 15650, 15736, 15750, 15756, 15821, 15847, 15851, 17000, 17004, 17110, 17272, 17311, 17312, 17999, 19316, 19350, 19357, 19370, 20103, 20527, 20604, 20606, 20650, 20680, 20692, 20693, 20694, 20696, 20805, 20824, 20827, 20900, 20930, 20931, 20936, 20937, 20999, 21011, 21337, 21390, 22220, 22522, 22551, 22552, 22558, 22585, 22610, 22830, 22845, 22846, 22849, 22850, 22851, 22855, 22856, 22858, 23000, 23020, 23076, 23120, 23184, 23190, 23412, 23415, 23430, 23440, 23466, 23472, 23515, 23615, 23630, 23700, 23935, 24000, 24006, 24065, 24066, 24073, 24076, 24079, 24100, 24101, 24102, 24110, 24140, 24147, 24149, 24155, 24201, 24300, 24305, 24310, 24330, 24340, 24342, 24343, 24344, 24345, 24346, 24357, 24360, 24363, 24366, 24400, 24420, 24435, 24495, 24505, 24515, 24535, 24538, 24545, 24546, 24579, 24586, 24600, 24605, 24615, 24620, 24650, 24655, 24665, 24666, 24670, 24999, 25001, 25020, 25023, 25024, 25025, 25028, 25031, 25040, 25065, 25066, 25073, 25075, 25077, 25078, 25085, 25100, 25101, 25105, 25107, 25109, 25110, 25111, 25112, 25116, 25118, 25119, 25120, 25126, 25135, 25136, 25145, 25150, 25151, 25170, 25215, 25240, 25250, 25259, 25260, 25263, 25265, 25270, 25272, 25274, 25275, 25280, 25290, 25295, 25300, 25301, 25310, 25312, 25315, 25332, 25337, 25350, 25355, 25360, 25390, 25391, 25394, 25400, 25405, 25420, 25425, 25430, 25431, 25440, 25441, 25442, 25445, 25446, 25447, 25449, 25490, 25515, 25525, 25526, 25535, 25545, 25565, 25574, 25600, 25606, 25607, 25609, 25622,

25624, 25628, 25630, 25635, 25645, 25650, 25651, 25652, 25660, 25670, 25671, 25675, 25676, 25680, 25685, 25690, 25695, 25805, 25810, 25820, 25825, 25830, 25999, 26010, 26011, 26020, 26025, 26030, 26035, 26037, 26040, 26045, 26070, 26075, 26080, 26100, 26110, 26111, 26113, 26117, 26118, 26123, 26125, 26130, 26135, 26140, 26145, 26170, 26180, 26185, 26230, 26236, 26260, 26320, 26340, 26341, 26350, 26352, 26356, 26357, 26358, 26370, 26372, 26373, 26390, 26412, 26415, 26418, 26420, 26428, 26433, 26440, 26442, 26445, 26449, 26450, 26455, 26460, 26471, 26474, 26476, 26477, 26478, 26479, 26483, 26485, 26489, 26490, 26492, 26494, 26496, 26497, 26498, 26499, 26500, 26502, 26508, 26510, 26516, 26518, 26520, 26525, 26530, 26531, 26535, 26536, 26540, 26541, 26542, 26546, 26548, 26550, 26565, 26567, 26591, 26593, 26600, 26605, 26608, 26615, 26645, 26650, 26665, 26670, 26675, 26676, 26685, 26686, 26706, 26715, 26727, 26735, 26746, 26750, 26756, 26770, 26775, 26776, 26785, 26820, 26841, 26844, 26850, 26852, 26860, 26861, 26910, 26952, 27193, 27228, 27245, 27250, 27266, 27360, 27427, 27506, 27524, 27535, 27600, 27601, 27602, 27632, 27680, 27691, 27696, 27769, 27780, 27786, 27814, 27842, 27880, 28008, 28035, 28041, 28045, 28055, 28060, 28080, 28086, 28120, 28200, 28234, 28270, 28272, 28289, 28299, 28313, 28470, 28475, 28496, 28510, 28525, 28605, 28725, 28750, 28825, 29806, 29828, 29873, 29900, 29901, 29999, 30130, 30901, 34111, 34471, 35045, 35207, 35261, 35458, 35523, 37618, 37765, 38500, 42415, 43999, 44721, 49572, 49587, 50020, 54450, 56740, 57240, 58563, 58670, 61000, 61548, 62368, 62370, 63001, 63015, 63020, 63045, 63046, 63048, 63057, 63075, 63081, 63082, 63685, 64510, 64605, 64704, 64712, 64716, 64719, 64722, 64726, 64782, 64783, 64787, 64790, 64792, 64818, 64820, 64821, 64822, 64823, 64831, 64832, 64834, 64835, 64836, 64837, 64856, 64859, 64874, 64890, 64891, 64893, 64895, 64896, 64897, 64905, 66982, 66984, 67875, 67900, 67950, 69631, 97597, 97810, 99490, G0127,

2. **Knee arthroscopic minesectomy (scope):** 0263T, 10160, 10180, 11401, 11422, 11750, 13120, 14020, 14060, 15040, 15300, 15823, 15833, 15850, 15852, 17004, 19101, 19380, 20225, 20526, 20606, 20611, 20694, 20920, 20922, 21030, 21340, 21899, 22524, 23076, 23105, 23120, 23130, 23420, 23470, 23472, 23515, 23700, 23931, 24075, 24105, 24341, 24342, 24350, 24358, 24359, 24635, 25000, 25076, 25118, 25130, 25210, 25230, 25310, 25320, 25447, 25608, 25628, 25825, 26010, 26116, 26121, 26145, 26160, 26200, 26340, 26341, 26445, 26525, 26540, 26608, 26727, 26755, 26862, 26863, 26951, 27065, 27097, 27137, 27165, 27170, 27244, 27275, 27299, 27303, 27306, 27323, 27326, 27327, 27329, 27331, 27332, 27333, 27334, 27335, 27347, 27350, 27356, 27364, 27372, 27381, 27386, 27390, 27396, 27400, 27403, 27405, 27407, 27409, 27412, 27415, 27416, 27420, 27422, 27424, 27429, 27430, 27435, 27438, 27440, 27441, 27442, 27445, 27446, 27448, 27495, 27497, 27498, 27503, 27509, 27510, 27511, 27513, 27514, 27520, 27530, 27532, 27535, 27540, 27557, 27558, 27566, 27600, 27603, 27605, 27606, 27613, 27614, 27620, 27632, 27634, 27635, 27638, 27647, 27650, 27652, 27658, 27659, 27664, 27675, 27676, 27685,

27695, 27696, 27700, 27704, 27707, 27720, 27724, 27734, 27745, 27756, 27766, 27792, 27832, 27870, 27881, 27882, 27893, 27894, 27899, 28002, 28022, 28024, 28039, 28043, 28045, 28046, 28050, 28060, 28072, 28092, 28100, 28104, 28107, 28112, 28113, 28118, 28119, 28120, 28160, 28190, 28192, 28250, 28285, 28288, 28289, 28290, 28292, 28296, 28297, 28298, 28300, 28304, 28306, 28490, 28740, 28810, 28899, 29805, 29807, 29824, 29828, 29866, 29868, 29905, 30520, 30802, 30930, 36460, 37722, 37765, 38206, 38220, 38232, 38240, 40800, 42821, 49560, 49570, 53447, 56605, 57282, 57285, 58545, 58558, 62362, 64455, 64892, 64910, 66984, 95920, C5272, C5273, G0472,

3. **Lap chole w/ and w/out IOC:** 22902, 38570, 43280, 43644, 43752, 43775, 44204, 44205, 44238, 44979, 47001, 47379, 47490, 47564, 47579, 47605, 47999, 49020, 49080, 49329, 49565, 49572, 49585, 58660,
4. **Lap inguinal hernia repair:** 0249T, 0336T, 10021, 10022, 10160, 11005, 11201, 11302, 11402, 11404, 11406, 11424, 11441, 11442, 11443, 11444, 11446, 11606, 11622, 11643, 11644, 11770, 11771, 12034, 12052, 13101, 14001, 14021, 14301, 15240, 15241, 15360, 15361, 15734, 15830, 15847, 15877, 17003, 17110, 19260, 19300, 19325, 19371, 20680, 21012, 21552, 21554, 21556, 21935, 22905, 24071, 24076, 24201, 25248, 27001, 27006, 27045, 27047, 27048, 27327, 27345, 27347, 27364, 27618, 27632, 27680, 27698, 28110, 28238, 28240, 28308, 30140, 33517, 35206, 35665, 35840, 36478, 37202, 37722, 37765, 38589, 39502, 41112, 41120, 42140, 43246, 43282, 43332, 43450, 43499, 43644, 43651, 43659, 43752, 43770, 43774, 44110, 44180, 44213, 44227, 44320, 44604, 44615, 44799, 44970, 45171, 45905, 45990, 46220, 46221, 46230, 46320, 46505, 46924, 46930, 46945, 46946, 49002, 49204, 49322, 49324, 49326, 49400, 49402, 49435, 49495, 49500, 49507, 49525, 49540, 49550, 49553, 49557, 49580, 49582, 49590, 49600, 50590, 51999, 52630, 52640, 52648, 53500, 53600, 53605, 54055, 54056, 54150, 54162, 54512, 54522, 54530, 54650, 54692, 54699, 54860, 55000, 55040, 55041, 55060, 55110, 55120, 55200, 55450, 55535, 55540, 55550, 55899, 56800, 57210, 57240, 57250, 57260, 57265, 57268, 57280, 57283, 57287, 57295, 57423, 57426, 58260, 58262, 58270, 58410, 58541, 58545, 58546, 58550, 58552, 58555, 58565, 58578, 58600, 58661, 58662, 58671, 58673, 58700, 58825, 58999, 62361, 64761, 64763, 64776, 65222, 69110, 92950, 97813, 97814,
5. **Lap low anterior resection w/o or w/out stoma:** 11008, 12013, 14302, 20926, 21011, 22902, 27339, 32505, 32506, 32556, 32900, 33967, 37617, 38129, 39560, 39599, 43775, 44005, 44110, 44120, 44145, 44146, 44188, 44202, 44203, 44212, 44345, 44602, 44620, 44650, 44660, 44661, 44701, 44799, 44950, 44955, 45111, 45114, 45136, 45171, 45172, 45395, 45397, 45399, 45400, 45800, 45805, 45910, 45915, 45990, 46220, 46710, 46744, 47000, 47122, 47371, 47399, 48000, 49010, 49021, 49203, 49204, 49321, 49322, 49323, 49327, 49557, 49999, 50220, 50230, 50541, 50785, 51500, 53660, 54060, 54700, 55875, 55899, 57106, 57107, 57260, 57305, 57426, 58350, 58353, 58541, 58542, 58544, 58548, 58554, 58611, 58720, 58953, 93460,

6. **Lap nephrectomy partial or total:** 15830, 23078, 32320, 32608, 34151, 34802, 34812, 34825, 34826, 35122, 35471, 35761, 36248, 37242, 38101, 38115, 38120, 39501, 43282, 43611, 43775, 44020, 44205, 44213, 44899, 47100, 47120, 47370, 47785, 47900, 49205, 49320, 49321, 49402, 50010, 50060, 50080, 50130, 50135, 50200, 50205, 50225, 50234, 50236, 50240, 50250, 50280, 50325, 50328, 50360, 50380, 50389, 50400, 50435, 50540, 50547, 50590, 50650, 50706, 50780, 50830, 51040, 51555, 51570, 52356, 52400, 52601, 53500, 53899, 54161, 55550, 57107, 57283, 58661, 58740, 58940, 58957, 60540, 62223, 88037, 93455, G0269,
7. **Lap prostate w/ or w/out robot:** 11626, 12045, 15115, 15275, 27045, 27049, 35840, 36246, 37211, 38542, 38700, 38765, 44137, 44150, 44238, 44310, 44603, 44800, 44955, 45562, 48999, 49000, 49323, 49325, 49326, 49400, 49402, 49585, 49606, 49651, 49659, 50393, 50432, 50525, 50544, 50605, 50800, 50815, 50820, 50860, 50940, 50947, 50948, 51050, 51101, 51520, 51530, 51555, 51575, 51590, 51595, 51596, 51597, 51800, 51820, 51980, 51992, 51999, 52649, 53020, 53215, 53400, 53410, 53431, 53440, 53449, 53899, 54057, 54405, 55600, 55650, 55810, 55812, 55815, 55840, 55842, 55845, 55865, 55876, 64581, 64590, 64910, 92950, 93454,
8. **Lap/Robotic hysterectomy:** 0171T, 0249T, 11042, 11056, 111, 11100, 112, 11200, 11301, 11302, 11307, 11400, 11402, 11403, 11404, 11406, 11420, 11423, 11470, 11623, 11624, 11721, 11730, 11954, 11976, 11980, 12015, 12041, 121, 13101, 14001, 14041, 14302, 15101, 15274, 15430, 15757, 15777, 15879, 17000, 17003, 19000, 19285, 19286, 19290, 19302, 19307, 19318, 19328, 19330, 19340, 19342, 19370, 20206, 20696, 20920, 22900, 22901, 23410, 24200, 27045, 27301, 28055, 28293, 28485, 28715, 33320, 35571, 35870, 36260, 36830, 37242, 37660, 38900, 38999, 43659, 43772, 43840, 44025, 44111, 44130, 44187, 44202, 44206, 44210, 44212, 44602, 44605, 44615, 44680, 44700, 44979, 45130, 45395, 45397, 45400, 45402, 45499, 45505, 45540, 45541, 45560, 45562, 45999, 46220, 46230, 46250, 46260, 46750, 46761, 46946, 46999, 47001, 47579, 49215, 49322, 49323, 49324, 49329, 49402, 49406, 49418, 49421, 49425, 49560, 49566, 49570, 49587, 49610, 49651, 49905, 50020, 50386, 50390, 50392, 50405, 50549, 50600, 50660, 50700, 50722, 50900, 50945, 50948, 51010, 51020, 51040, 51525, 51535, 51565, 51585, 51725, 51840, 51841, 51845, 51865, 51900, 51990, 52500, 52700, 53200, 53210, 53230, 53265, 53275, 53430, 53460, 53500, 53502, 53661, 53665, 55980, 56420, 56440, 56442, 56501, 56515, 56625, 56630, 56631, 56700, 56740, 56820, 56821, 57000, 57010, 57023, 57061, 57065, 57130, 57230, 57250, 57265, 57267, 57270, 57284, 57287, 57288, 57289, 57296, 57308, 57320, 57335, 57420, 57421, 57423, 57455, 57461, 57520, 57522, 57530, 57558, 57720, 58120, 58145, 58146, 58263, 58270, 58275, 58280, 58285, 58290, 58291, 58345, 58353, 58356, 58400, 58520, 58559, 58560, 58561, 58562, 58565, 58578, 58579, 58671, 58673, 58679, 58750, 58770, 58800, 58805, 58825, 58920, 58943, 58951, 58952, 58954,

58956, 58957, 58958, 58960, 58970, 59300, 59812, 59871, 60260, 60650, 62365, 64581, 64590, 64630, 64858, 64862, 64874, 97810, G0269, G0339, G0436,

9. **Lumbar laminotomy/laminectomy (posterior):** 0171T, 0172T, 0195T, 0274T, 0275T, 0334T, 10022, 10121, 10140, 111, 11200, 11400, 12021, 13102, 13133, 13152, 13160, 14301, 15271, 15731, 15770, 15933, 17003, 20220, 20251, 20661, 20665, 20900, 20957, 20975, 20985, 21210, 21600, 22015, 22100, 22101, 22103, 22110, 22112, 22116, 22206, 22207, 22208, 22212, 22214, 22216, 22224, 22226, 22305, 22315, 22325, 22326, 22327, 22328, 22505, 22510, 22511, 22512, 22513, 22514, 22515, 22521, 22522, 22524, 22525, 22526, 22532, 22533, 22534, 22551, 22554, 22556, 22586, 22600, 22612, 22614, 22630, 22632, 22633, 22634, 22800, 22802, 22804, 22808, 22810, 22812, 22818, 22840, 22841, 22842, 22843, 22844, 22846, 22848, 22852, 22855, 22856, 22857, 22861, 22862, 22899, 23930, 24120, 24358, 27279, 27280, 27830, 27840, 28220, 28496, 29999, 30903, 31500, 31603, 33405, 33533, 35184, 35221, 38206, 38220, 38221, 38230, 38241, 39220, 40831, 45520, 51102, 51710, 53601, 57461, 61510, 61795, 62230, 62272, 62280, 62282, 62287, 62305, 62351, 62360, 62362, 63001, 63003, 63012, 63015, 63016, 63017, 63035, 63040, 63043, 63044, 63050, 63051, 63055, 63056, 63057, 63064, 63076, 63077, 63078, 63081, 63082, 63087, 63088, 63090, 63091, 63101, 63102, 63103, 63173, 63185, 63190, 63200, 63250, 63252, 63265, 63266, 63267, 63268, 63270, 63271, 63272, 63273, 63276, 63277, 63278, 63281, 63282, 63287, 63650, 63655, 63661, 63662, 63685, 63688, 63702, 63707, 63709, 63710, 64595, 64622, 64623, 64626, 64627, 64635, 64636, 64714, 64718, 64719, 64911, 69930, 90870, 92973, 92982, 93567, 95961, 95962, G0283, G0436,
10. **Lumpectomy w/ and w/out SLNB:** 0239T, 10120, 10140, 11000, 11300, 11301, 11306, 11403, 11404, 11406, 11421, 11426, 11450, 11622, 11642, 11900, 11952, 11954, 11970, 11971, 11976, 12031, 12037, 13102, 13151, 14020, 14021, 14041, 14060, 14301, 15003, 15130, 15170, 15200, 15260, 15272, 15273, 15330, 15570, 15650, 15734, 15740, 15777, 15879, 19000, 19081, 19082, 19083, 19084, 19085, 19086, 19100, 19126, 19271, 19282, 19284, 19296, 19297, 19298, 19305, 19306, 19324, 19325, 19328, 19330, 19340, 19355, 19361, 19366, 19371, 19499, 20660, 20926, 21012, 21014, 21501, 21550, 21552, 21554, 21557, 21558, 21630, 21930, 21931, 22900, 22901, 22903, 23071, 23076, 25075, 26990, 27337, 27610, 28515, 28525, 30465, 30930, 31720, 33284, 35216, 35246, 35800, 35820, 37182, 37766, 38300, 38305, 38308, 38700, 38724, 38746, 39220, 42410, 44005, 46270, 46288, 46922, 49320, 49555, 50389, 55876, 56405, 58120, 58262, 58561, 58562, 58563, 58660, 59820, 60220, 60240, 60252, 60512, 61108, 61592, 62350, 64492, 64633, 67028, 67210, 67840, 68525, 77785, 77786, 79005, 92920, 92950, 97811, 97813, 97814, 99183, C9728, G0300,
11. **Open inguinal hernia repair:** 0078T, 0079T, 0080T, 0081T, 11005, 11008, 11042, 11046, 11055, 11201, 11300, 11306, 11307, 11310, 11421, 11422, 11424, 11426, 11443, 11444, 11446, 11463, 11471, 11601, 11604, 11606, 11640, 11641, 11642, 11643, 11771, 12001,

12002, 12013, 12031, 12044, 13121, 14301, 15220, 15221, 15271, 15400, 15431, 15736, 15738, 15877, 17262, 19101, 19300, 19307, 19342, 19364, 19371, 19380, 20000, 20005, 20102, 20922, 21012, 21615, 21920, 21931, 21932, 21933, 22900, 22905, 23071, 23397, 23412, 24071, 24075, 24200, 25065, 25071, 25111, 25115, 26055, 26105, 26160, 26235, 26426, 26990, 27035, 27041, 27043, 27059, 27065, 27087, 27098, 27245, 27324, 27326, 27328, 27337, 27339, 27599, 27614, 27618, 27899, 28001, 28039, 28047, 30140, 32555, 33210, 33234, 33249, 33967, 34803, 34812, 35226, 35286, 35301, 35302, 35371, 35565, 35583, 35585, 35646, 35656, 35665, 35860, 35883, 36005, 36247, 36475, 36821, 36832, 37202, 37204, 37212, 37236, 37766, 37785, 38221, 38505, 38510, 38564, 38571, 38745, 38760, 39540, 42804, 43107, 43335, 43458, 43610, 43659, 43752, 43773, 44010, 44050, 44121, 44155, 44180, 44340, 44626, 44820, 44850, 45395, 45505, 45905, 46030, 46040, 46080, 46200, 46221, 46255, 46505, 46700, 46754, 46917, 46922, 46947, 47379, 47380, 47505, 47560, 47780, 48120, 49010, 49082, 49083, 49204, 49205, 49255, 49325, 49400, 49421, 49422, 49435, 49491, 49492, 49495, 49500, 49501, 49507, 49520, 49521, 49525, 49550, 49555, 49582, 49590, 49659, 49900, 49905, 50040, 50220, 50325, 50360, 50385, 50393, 50395, 50398, 50728, 51045, 51597, 51999, 52647, 52648, 52649, 53410, 53440, 53445, 53447, 53449, 53450, 53500, 53852, 54055, 54057, 54060, 54100, 54150, 54161, 54162, 54163, 54235, 54300, 54360, 54401, 54406, 54408, 54410, 54415, 54416, 54500, 54505, 54512, 54520, 54535, 54550, 54620, 54640, 54660, 54690, 54800, 54830, 54840, 54861, 55100, 55150, 55175, 55180, 55400, 55500, 55530, 55540, 55559, 55810, 55815, 55821, 55831, 55845, 55875, 56810, 57065, 57120, 57135, 57200, 57220, 57267, 57282, 57284, 57296, 57540, 57550, 58140, 58152, 58540, 58559, 58565, 58578, 58600, 58662, 58954, 59514, 59515, 62270, 62361, 64520, 64702, 64708, 64740, 64752, 64755, 64766, 64771, 64772, 64786, 64795, 64999, 68815, 69100, 69110, 92928, 92973, 92980, 96567, C1300, G0283,

12. **Open Lung Lobectomy:** 11721, 19260, 19272, 20101, 21556, 21632, 21811, 31600, 31805, 31899, 32095, 32096, 32098, 32100, 32120, 32124, 32141, 32220, 32225, 32310, 32405, 32421, 32440, 32488, 32500, 32501, 32503, 32504, 32505, 32506, 32507, 32555, 32608, 32609, 32667, 32668, 32669, 32670, 32674, 32900, 32940, 32997, 32998, 32999, 33020, 33025, 33030, 33050, 33335, 33518, 33530, 33572, 33724, 33917, 33925, 33999, 34201, 35201, 35211, 35271, 37620, 38381, 38542, 42826, 43101, 43335, 43640, 49203, 49568, 53620, 58150, 60521, 60522, 62281, 63085, 64492, 93503,

13. **Parathyroidectomy:** 11101, 11305, 11403, 11420, 11440, 11643, 11644, 11720, 12051, 13132, 13133, 15175, 15576, 15740, 20100, 20926, 21016, 21453, 21501, 30117, 31365, 31367, 31750, 31780, 31786, 31800, 32673, 35201, 35701, 36011, 36522, 36625, 37700, 37761, 37785, 38500, 38525, 38720, 38724, 39000, 39010, 41100, 42104, 42106, 42182, 42420, 42500, 42505, 42699, 43450, 46261, 46922, 49561, 57283, 58552, 60100, 60200,



60210, 60212, 60225, 60254, 60270, 60271, 60280, 60281, 60300, 60502, 60520, 60600, 60659, 60699, 64553, 64555, 64716, 64788, 69205, 69505, 69540, 99490,

14. **Partial colectomy w/ or w/out stoma:** 11006, 11043, 11401, 11404, 11601, 12006, 12014, 12051, 12054, 14302, 15170, 15171, 15274, 15830, 15920, 19020, 19307, 20102, 20525, 20690, 21620, 22904, 22905, 22999, 23500, 25020, 25575, 25605, 25609, 25670, 25676, 26765, 26990, 27086, 27220, 27766, 27810, 32110, 33213, 33315, 33910, 34401, 34502, 35226, 35236, 35572, 35654, 35661, 36148, 36248, 36251, 36253, 36260, 36299, 36800, 37191, 37236, 37243, 37244, 37617, 37799, 38101, 38102, 38115, 38120, 38999, 39541, 39545, 43122, 43282, 43327, 43332, 43415, 43500, 43605, 43610, 43611, 43620, 43621, 43631, 43632, 43633, 43634, 43635, 43653, 43760, 43774, 43800, 43830, 43848, 43860, 43880, 44010, 44020, 44021, 44025, 44055, 44125, 44126, 44135, 44137, 44147, 44151, 44155, 44204, 44227, 44300, 44314, 44340, 44345, 44346, 44603, 44604, 44625, 44626, 44640, 44661, 44680, 44700, 44701, 44799, 44820, 44850, 44900, 44960, 45020, 45100, 45110, 45111, 45112, 45113, 45123, 45126, 45171, 45172, 45399, 45402, 45550, 45800, 45915, 46050, 46060, 46320, 46740, 47010, 47122, 47125, 47300, 47350, 47360, 47361, 47370, 47380, 47382, 47399, 47480, 47490, 47510, 47610, 47630, 47760, 48120, 48140, 48145, 48155, 48500, 48545, 49002, 49021, 49040, 49060, 49061, 49080, 49083, 49084, 49203, 49250, 49321, 49405, 49419, 49420, 49421, 49440, 49521, 49566, 49585, 49606, 49659, 49904, 49999, 50075, 50500, 50605, 50715, 50727, 50760, 50825, 50840, 50947, 51040, 51550, 51565, 51590, 51800, 51900, 51960, 53502, 53899, 55250, 56606, 56620, 57105, 57110, 57267, 57282, 57283, 57295, 57300, 57305, 57307, 58140, 58180, 58200, 58210, 58240, 58542, 58558, 58611, 58672, 58700, 58760, 58805, 58823, 58900, 58925, 58950, 58951, 58952, 58953, 58954, 58956, 58958, 58960, 58999, 59510, 60545, 840, 96910, 99183,
15. **Rotator Cuff Surgery:** 0263T, 10040, 11047, 11055, 11403, 11623, 12002, 12011, 15330, 15777, 15879, 19125, 19290, 19291, 20103, 20205, 20206, 20245, 20526, 20611, 20827, 20902, 20924, 20975, 21320, 21330, 21555, 21899, 21931, 22903, 23000, 23020, 23030, 23031, 23040, 23044, 23065, 23066, 23073, 23075, 23077, 23078, 23101, 23105, 23106, 23107, 23125, 23130, 23140, 23150, 23156, 23170, 23180, 23182, 23200, 23210, 23330, 23331, 23333, 23334, 23395, 23405, 23406, 23415, 23450, 23455, 23460, 23462, 23465, 23466, 23470, 23480, 23485, 23491, 23530, 23550, 23552, 23585, 23600, 23615, 23616, 23625, 23655, 23660, 23665, 23670, 23800, 24065, 24066, 24116, 24301, 24340, 24341, 24343, 24357, 24359, 24430, 24515, 24999, 25071, 25116, 25215, 25295, 25320, 25420, 25530, 26055, 26060, 26080, 26115, 26145, 26210, 26410, 26432, 26480, 26842, 27236, 27337, 27380, 27418, 27570, 27630, 27698, 27781, 27823, 27824, 27826, 27827, 27828, 27829, 27899, 28086, 28090, 28108, 28297, 28298, 28299, 28310, 28600, 28730, 29824, 29828, 29866, 29873, 29999, 32405, 33967, 35302, 35372, 36475, 38220, 38232, 38243,

42900, 47362, 49587, 57106, 62350, 62360, 64510, 66821, 69436, 93458, 95920, 96910, G0460,

16. **Simple Mastectomy w/out reconstruction:** 0239T, 0245T, 10160, 10180, 11045, 11046, 11100, 11101, 11303, 11311, 11402, 11420, 11440, 11450, 11601, 11603, 11640, 11900, 11901, 11921, 11971, 12007, 12011, 12031, 12036, 12037, 12042, 12047, 12057, 13100, 13102, 13133, 14001, 14021, 15003, 15004, 15005, 15100, 15110, 15111, 15130, 15131, 15150, 15151, 15170, 15171, 15175, 15200, 15201, 15272, 15277, 15278, 15300, 15301, 15330, 15331, 15335, 15340, 15341, 15361, 15400, 15401, 15570, 15600, 15732, 15757, 15758, 15839, 15850, 15877, 17111, 19020, 19100, 19102, 19103, 19120, 19125, 19126, 19281, 19283, 19285, 19286, 19287, 19288, 19295, 19297, 19298, 19305, 19306, 19318, 19324, 19361, 19367, 19368, 19369, 19370, 20102, 20200, 20240, 20910, 21026, 21557, 21700, 21899, 21932, 22899, 22902, 22903, 23395, 27645, 27759, 31599, 32422, 32550, 32820, 33284, 34051, 34520, 34530, 35236, 35246, 35251, 35875, 35876, 36262, 37202, 37616, 38308, 3852, 38520, 38530, 38550, 38555, 38720, 38745, 42962, 44139, 49010, 49561, 49904, 58291, 58925, 62230, 64633, 64713, 64722, 64727, 64784, 64857, 64893, 64898, 64911, 67314, 67917, 69145, 75756, 88037, 92240, 97597, 97598, 97811, C5271, C5274, C9728,
17. **TKA:** 0054T, 11056, 11300, 11406, 11719, 11720, 11721, 11952, 120, 12032, 12034, 12035, 12037, 13120, 13152, 15331, 15738, 20240, 20245, 20520, 20690, 20902, 20930, 20938, 20983, 21930, 22840, 22851, 24101, 25000, 25607, 25800, 26116, 26437, 26517, 26548, 27090, 27100, 27137, 27147, 27170, 27200, 27240, 27266, 27305, 27310, 27324, 27329, 27330, 27331, 27332, 27333, 27339, 27350, 27355, 27356, 27358, 27364, 27385, 27386, 27391, 27392, 27393, 27394, 27409, 27412, 27418, 27422, 27425, 27428, 27429, 27430, 27438, 27440, 27442, 27443, 27445, 27454, 27455, 27457, 27465, 27470, 27472, 27477, 27486, 27487, 27488, 27497, 27511, 27514, 27524, 27536, 27556, 27558, 27599, 27605, 27619, 27632, 27637, 27640, 27645, 27687, 27709, 27720, 27740, 27745, 27810, 28010, 28041, 28122, 28232, 28270, 28307, 28755, 30560, 33210, 34203, 35151, 35256, 35303, 35305, 35556, 35741, 36012, 37191, 37226, 38240, 42410, 51102, 54001, 60000, 62273, 63700, 64455, 64774, 67500, 68761, 92980, 93454, G0299,
18. **Total hip:** 0055T, 0263T, 10061, 11401, 12001, 12004, 12034, 12035, 12052, 121, 15852, 20900, 20936, 24130, 24332, 24545, 24685, 25545, 25600, 25905, 26992, 27000, 27005, 27025, 27027, 27033, 27036, 27048, 27054, 27060, 27062, 27066, 27070, 27071, 27076, 27090, 27100, 27110, 27120, 27125, 27132, 27134, 27138, 27140, 27146, 27147, 27151, 27156, 27161, 27165, 27187, 27216, 27217, 27220, 27226, 27227, 27230, 27235, 27238, 27244, 27248, 27252, 27254, 27259, 27265, 27269, 27275, 27305, 27357, 27360, 27365, 27397, 27437, 27450, 27466, 27487, 27495, 27506, 27507, 27570, 27619, 27705, 27786, 28116, 28400, 31720, 35721, 36246, 37618, 46210, 5371, 58615, 62282, 64415, 64520, 64712, 64718, 66761, 68750, 8028, 92941, 92973, 93455, 97810, 97811, G0299, G0415,

19. **VATS Wedge:** 15732, 21558, 21810, 21811, 30100, 31899, 32096, 32097, 32100, 32124, 32141, 32215, 32405, 32482, 32484, 32507, 32550, 32555, 32607, 32609, 32669, 32670, 32672, 32673, 32815, 33030, 33322, 33533, 35022, 35276, 39200, 39501, 39540, 39545, 39560, 39561, 39599, 42415, 43101, 47130, 49406, 49422, 58662, 60659, 62355, 64746, 79005,
20. **Whipple, open:** 17999, 35221, 35231, 35251, 35281, 35341, 35521, 35572, 37565, 38100, 38102, 42000, 43246, 43332, 43520, 43820, 43832, 43860, 43870, 44120, 44130, 4465, 44970, 45800, 47420, 47460, 47700, 47711, 47715, 47741, 47760, 47765, 47785, 47801, 47999, 48100, 48140, 48152, 48400, 48510, 48999, 49020, 49327, 49440, 50230, 50240, 77786,

**Appendix C: Cohort flow chart.**

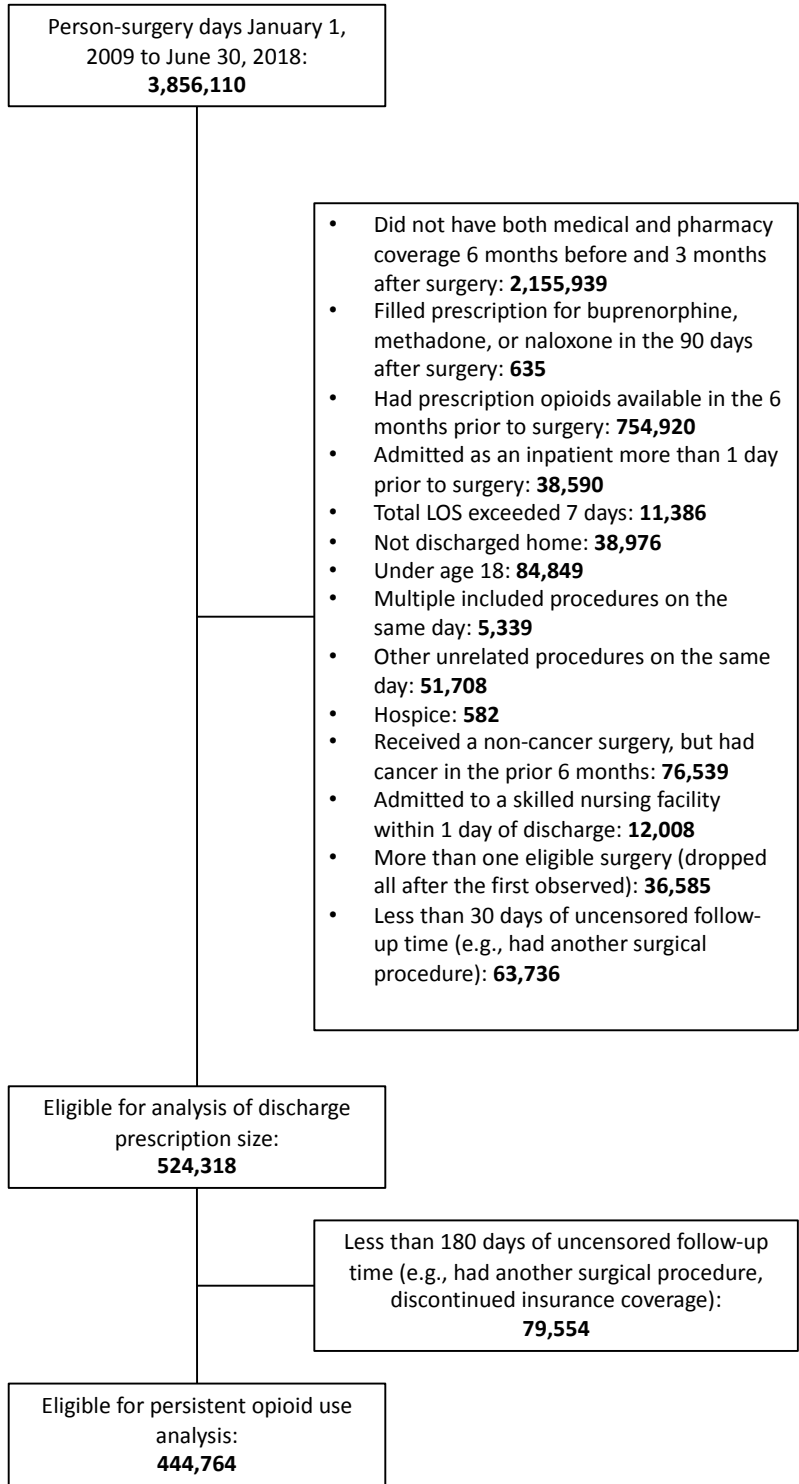

**Appendix D: Complete cohort characteristics for main study cohort (patients with at least 180 days of uncensored follow-up)**

|                        | All patients |         | No opioid fill |        | Tramadol only |        | Other short-acting |         | Tramadol + other short-acting |       | Any long-acting |       |
|------------------------|--------------|---------|----------------|--------|---------------|--------|--------------------|---------|-------------------------------|-------|-----------------|-------|
|                        | Percent      | N       | Percent        | N      | Percent       | N      | Percent            | N       | Percent                       | N     | Percent         | N     |
| <b>Category Total</b>  | 100.0        | 444,764 | 19.5           | 86,880 | 3.0           | 13,519 | 74.9               | 333,289 | 1.2                           | 5,457 | 1.3             | 5,619 |
| <b>Sex</b>             |              |         |                |        |               |        |                    |         |                               |       |                 |       |
| Male                   | 51.0         | 226,909 | 47.9           | 41,624 | 37.9          | 5,130  | 52.3               | 174,368 | 46.6                          | 2,543 | 57.7            | 3,244 |
| Female                 | 49.0         | 217,855 | 52.1           | 45,256 | 62.1          | 8,389  | 47.7               | 158,921 | 53.4                          | 2,914 | 42.3            | 2,375 |
| <b>Age</b>             |              |         |                |        |               |        |                    |         |                               |       |                 |       |
| 18-24                  | 3.7          | 16,282  | 3.1            | 2,695  | 2.1           | 281    | 3.9                | 13,007  | 1.9                           | 105   | 3.5             | 194   |
| 25-34                  | 7.0          | 30,914  | 4.9            | 4,237  | 5.5           | 741    | 7.7                | 25,553  | 3.4                           | 184   | 3.5             | 199   |
| 35-44                  | 13.0         | 57,936  | 9.7            | 8,437  | 9.8           | 1,329  | 14.2               | 47,371  | 6.8                           | 369   | 7.7             | 430   |
| 45-54                  | 21.5         | 95,802  | 18.6           | 16,180 | 17.5          | 2,366  | 22.6               | 75,207  | 15.4                          | 839   | 21.5            | 1,210 |
| 55-64                  | 25.4         | 112,956 | 23.8           | 20,690 | 24.8          | 3,349  | 25.6               | 85,400  | 28.1                          | 1,532 | 35.3            | 1,985 |
| 65-74                  | 19.4         | 86,476  | 23.6           | 20,479 | 24.7          | 3,340  | 17.9               | 59,696  | 30.5                          | 1,666 | 23.1            | 1,295 |
| 75+                    | 10.0         | 44,398  | 16.3           | 14,162 | 15.6          | 2,113  | 8.1                | 27,055  | 14.0                          | 762   | 5.5             | 306   |
| <b>Race/ethnicity</b>  |              |         |                |        |               |        |                    |         |                               |       |                 |       |
| White                  | 78.3         | 348,275 | 77.5           | 67,365 | 76.4          | 10,325 | 78.4               | 261,329 | 83.1                          | 4,533 | 84.1            | 4,723 |
| Black                  | 7.8          | 34,758  | 7.9            | 6,873  | 6.9           | 931    | 7.9                | 26,270  | 6.1                           | 334   | 6.2             | 350   |
| Hispanic               | 8.4          | 37,474  | 8.7            | 7,535  | 11.7          | 1,577  | 8.3                | 27,801  | 5.8                           | 316   | 4.4             | 245   |
| Asian                  | 2.3          | 10,043  | 2.3            | 2,030  | 1.8           | 245    | 2.3                | 7,589   | 1.4                           | 74    | 1.9             | 105   |
| Unknown/Other          | 3.2          | 14,214  | 3.5            | 3,077  | 3.3           | 441    | 3.1                | 10,300  | 3.7                           | 200   | 3.5             | 196   |
| <b>Census Division</b> |              |         |                |        |               |        |                    |         |                               |       |                 |       |
| New England            | 4.0          | 17,696  | 4.8            | 4,139  | 2.5           | 343    | 3.9                | 12,929  | 1.7                           | 92    | 3.4             | 193   |
| Mid Atlantic           | 6.6          | 29,330  | 7.3            | 6,378  | 5.5           | 737    | 6.5                | 21,798  | 4.3                           | 235   | 3.2             | 182   |
| East North Central     | 18.7         | 83,253  | 18.0           | 15,657 | 19.0          | 2,562  | 18.7               | 62,201  | 25.0                          | 1,364 | 26.1            | 1,469 |
| West North Central     | 14.7         | 65,309  | 18.3           | 15,921 | 12.6          | 1,706  | 13.7               | 45,658  | 17.4                          | 948   | 19.2            | 1,076 |
| South Atlantic         | 25.4         | 112,763 | 23.9           | 20,769 | 23.5          | 3,172  | 26.1               | 86,811  | 19.2                          | 1,047 | 17.2            | 964   |

|                                               | All patients |         | No opioid fill |        | Tramadol only |       | Other short-acting |         | Tramadol + other short-acting |       | Any long-acting |       |
|-----------------------------------------------|--------------|---------|----------------|--------|---------------|-------|--------------------|---------|-------------------------------|-------|-----------------|-------|
|                                               | Percent      | N       | Percent        | N      | Percent       | N     | Percent            | N       | Percent                       | N     | Percent         | N     |
| East South Central                            | 3.9          | 17,369  | 3.7            | 3,193  | 1.9           | 256   | 4.1                | 13,664  | 2.3                           | 127   | 2.3             | 129   |
| West South Central                            | 11.8         | 52,518  | 10.0           | 8,642  | 23.3          | 3,153 | 11.9               | 39,682  | 14.3                          | 781   | 4.6             | 260   |
| Mountain                                      | 9.3          | 41,421  | 8.5            | 7,344  | 8.2           | 1,103 | 9.4                | 31,397  | 11.8                          | 642   | 16.6            | 935   |
| Pacific/Unk/Other                             | 5.6          | 25,105  | 5.6            | 4,837  | 3.6           | 487   | 5.8                | 19,149  | 4.1                           | 221   | 7.3             | 411   |
| <b>Coverage type</b>                          |              |         |                |        |               |       |                    |         |                               |       |                 |       |
| Commercial                                    | 72.3         | 321,365 | 61.6           | 53,479 | 61.8          | 8,348 | 75.7               | 252,186 | 58.5                          | 3,194 | 74.0            | 4,158 |
| Medicare—aged                                 | 25.9         | 115,000 | 36.2           | 31,441 | 36.4          | 4,915 | 22.5               | 75,138  | 39.8                          | 2,172 | 23.7            | 1,334 |
| Medicare—disabled                             | 1.9          | 8,399   | 2.3            | 1,960  | 1.9           | 256   | 1.8                | 5,965   | 1.7                           | 91    | 2.3             | 127   |
| <b>Surgery</b>                                |              |         |                |        |               |       |                    |         |                               |       |                 |       |
| Carpal tunnel release                         | 7.6          | 33,730  | 10.9           | 9,475  | 8.6           | 1,167 | 6.9                | 22,984  | 1.5                           | 84    | 0.4             | 20    |
| Knee arthroscopic minesectiony (scope)        | 20.3         | 90,064  | 17.5           | 15,229 | 13.8          | 1,869 | 21.5               | 71,764  | 9.5                           | 516   | 12.2            | 686   |
| Lap chole w/ and w/out IOC                    | 23.7         | 105,346 | 24.5           | 21,264 | 22.7          | 3,068 | 24.2               | 80,598  | 7.0                           | 380   | 0.6             | 36    |
| Lap inguinal hernia repair                    | 5.6          | 24,806  | 5.1            | 4,463  | 3.4           | 453   | 5.9                | 19,800  | 1.4                           | 75    | 0.3             | 15    |
| Lap low anterior resection w/o or w/out stoma | 0.3          | 1,132   | 0.4            | 368    | 0.4           | 48    | 0.2                | 710     | –                             | –     | –               | –     |
| Lap nephrectomy partial or total              | 0.4          | 1,733   | 0.5            | 429    | 0.5           | 68    | 0.4                | 1,217   | –                             | –     | –               | –     |
| Lap prostate w/ or w/out robot                | 2.0          | 8,804   | 1.8            | 1,561  | 4.5           | 608   | 2.0                | 6,601   | –                             | –     | –               | –     |
| Lap/Robotic hysterectomy                      | 0.7          | 3,042   | 1.0            | 845    | 0.8           | 103   | 0.6                | 2,069   | –                             | –     | –               | –     |
| Lumbar laminotomy/laminectomy (posterior)     | 3.8          | 16,695  | 4.2            | 3,653  | 4.7           | 635   | 3.7                | 12,159  | 2.3                           | 126   | 2.2             | 122   |
| Lumpectomy w/ and w/out SLNB                  | 3.9          | 17,181  | 5.4            | 4,673  | 6.3           | 846   | 3.5                | 11,593  | 1.0                           | 57    | 0.2             | 12    |
| Open Lung Lobectomy                           | 0.2          | 767     | 0.2            | 153    | 0.2           | 31    | 0.2                | 553     | 0.2                           | 13    | 0.3             | 17    |
| Open inguinal hernia                          | 9.7          | 43,052  | 8.5            | 7,345  | 5.4           | 734   | 10.4               | 34,779  | 3.1                           | 171   | 0.4             | 23    |

|                                                              | All patients |        | No opioid fill |       | Tramadol only |       | Other short-acting |        | Tramadol + other short-acting |       | Any long-acting |       |
|--------------------------------------------------------------|--------------|--------|----------------|-------|---------------|-------|--------------------|--------|-------------------------------|-------|-----------------|-------|
|                                                              | Percent      | N      | Percent        | N     | Percent       | N     | Percent            | N      | Percent                       | N     | Percent         | N     |
| repair                                                       |              |        |                |       |               |       |                    |        |                               |       |                 |       |
| Parathyroidectomy                                            | 1.3          | 5,872  | 2.9            | 2,532 | 1.2           | 156   | 1.0                | 3,176  | –                             | –     | –               | –     |
| Partial colectomy w/ or w/out stoma                          | 0.4          | 1,694  | 0.7            | 636   | 0.4           | 53    | 0.3                | 1,000  | –                             | –     | –               | –     |
| Rotator Cuff Surgery                                         | 5.1          | 22,587 | 3.4            | 2,920 | 2.0           | 274   | 5.3                | 17,811 | 5.3                           | 291   | 23.0            | 1,291 |
| Simple Mastectomy w/out reconstruction                       | 1.0          | 4,317  | 1.5            | 1,336 | 1.1           | 145   | 0.8                | 2,807  | –                             | –     | –               | –     |
| TKA                                                          | 9.1          | 40,250 | 6.5            | 5,621 | 13.2          | 1,786 | 8.4                | 28,061 | 43.6                          | 2,379 | 42.8            | 2,403 |
| Total hip                                                    | 5.2          | 23,068 | 4.8            | 4,190 | 10.7          | 1,441 | 4.6                | 15,213 | 23.0                          | 1,255 | 17.3            | 969   |
| Other                                                        | 0.1          | 624    | 0.2            | 187   | 0.3           | 34    | 0.1                | 394    | –                             | –     | –               | –     |
| Depression comorbidity                                       | 2.8          | 12,349 | 2.7            | 2,331 | 3.4           | 460   | 2.7                | 9,074  | 4.7                           | 255   | 4.1             | 229   |
| Obesity                                                      | 4.3          | 18,897 | 4.0            | 3,438 | 5.4           | 725   | 4.1                | 13,571 | 11.7                          | 637   | 9.4             | 526   |
| Diagnosis of Rheumatoid Arthritis or other collagen disorder | 1.3          | 5,607  | 1.5            | 1,298 | 2.0           | 272   | 1.1                | 3,804  | 2.2                           | 121   | 2.0             | 112   |

– Cell value suppressed to preserve patient deidentification; IOC: intraoperative cholangiogram; chole: cholecystectomy TKA: Total Knee Arthroplasty; w/: with; SNLB: sentinel lymph node biopsy; Lap: laparoscopic

## Appendix E: Cohort characteristics for all patients with at least 30 days of uncensored follow-up

|                         | All patients |                | No opioid fill |                | Tramadol only |               | Other short-acting |                | Tramadol + other short-acting |              | Any long-acting |              |
|-------------------------|--------------|----------------|----------------|----------------|---------------|---------------|--------------------|----------------|-------------------------------|--------------|-----------------|--------------|
|                         | col%         | N              | col%           | N              | col%          | N             | col%               | N              | col%                          | N            | col%            | N            |
| <b>Total (Row% / N)</b> | <b>100</b>   | <b>524,318</b> | <b>19.7</b>    | <b>103,117</b> | <b>3.1</b>    | <b>16,059</b> | <b>74.7</b>        | <b>391,922</b> | <b>1.2</b>                    | <b>6,483</b> | <b>1.3</b>      | <b>6,737</b> |
| <b>Sex</b>              |              |                |                |                |               |               |                    |                |                               |              |                 |              |
| Female                  | 49.4         | 258,956        | 52.4           | 54,017         | 62.4          | 10,014        | 48.1               | 188,585        | 53.4                          | 3,459        | 42.8            | 2,881        |
| <b>Age</b>              |              |                |                |                |               |               |                    |                |                               |              |                 |              |
| 18-24                   | 3.5          | 18,582         | 3.0            | 3,121          | 2.0           | 323           | 3.8                | 14,800         | 1.9                           | 121          | 3.2             | 217          |
| 25-34                   | 7.0          | 36,426         | 4.9            | 5,055          | 5.6           | 893           | 7.7                | 30,028         | 3.3                           | 213          | 3.5             | 237          |
| 35-44                   | 12.8         | 67,230         | 9.6            | 9,919          | 9.7           | 1,549         | 14.0               | 54,807         | 6.7                           | 434          | 7.7             | 521          |
| 45-54                   | 21.4         | 112,326        | 18.5           | 19,039         | 17.6          | 2,829         | 22.5               | 88,025         | 15.5                          | 1,006        | 21.2            | 1,427        |
| 55-64                   | 25.7         | 134,826        | 24.0           | 24,718         | 25.3          | 4,063         | 26.0               | 101,756        | 28.9                          | 1,873        | 35.9            | 2,416        |
| 65-74                   | 19.7         | 103,177        | 23.9           | 24,602         | 24.6          | 3,943         | 18.1               | 71,101         | 30.5                          | 1,975        | 23.1            | 1,556        |
| 75+                     | 9.9          | 51,751         | 16.2           | 16,663         | 15.3          | 2,459         | 8.0                | 31,405         | 13.3                          | 861          | 5.4             | 363          |
| <b>Race/ethnicity</b>   |              |                |                |                |               |               |                    |                |                               |              |                 |              |
| White                   | 78.3         | 410,567        | 77.6           | 79,975         | 76.7          | 12,315        | 78.4               | 307,267        | 82.7                          | 5,359        | 83.9            | 5,651        |
| Black                   | 7.9          | 41,344         | 7.9            | 8,185          | 6.9           | 1,103         | 8.0                | 31,222         | 6.3                           | 406          | 6.4             | 428          |
| Hispanic                | 8.4          | 43,983         | 8.6            | 8,893          | 11.4          | 1,836         | 8.3                | 32,558         | 6.2                           | 400          | 4.4             | 296          |
| Asian                   | 2.3          | 11,799         | 2.4            | 2,426          | 1.8           | 287           | 2.3                | 8,875          | 1.3                           | 85           | 1.9             | 126          |
| Unknown/Other           | 3.2          | 16,625         | 3.5            | 3,638          | 3.2           | 518           | 3.1                | 12,000         | 3.6                           | 233          | 3.5             | 236          |
| <b>Census Division</b>  |              |                |                |                |               |               |                    |                |                               |              |                 |              |
| New England             | 3.9          | 20,638         | 4.7            | 4,843          | 2.5           | 402           | 3.8                | 15,047         | 1.6                           | 105          | 3.6             | 241          |
| Mid Atlantic            | 6.5          | 34,304         | 7.4            | 7,586          | 5.3           | 853           | 6.5                | 25,360         | 4.4                           | 285          | 3.3             | 220          |
| East North Central      | 18.5         | 97,078         | 17.7           | 18,206         | 18.7          | 3,006         | 18.5               | 72,542         | 24.8                          | 1,606        | 25.5            | 1,718        |
| West North Central      | 14.8         | 77,441         | 18.8           | 19,384         | 12.7          | 2,039         | 13.7               | 53,619         | 17.5                          | 1,136        | 18.8            | 1,263        |
| South Atlantic          | 25.4         | 133,346        | 23.9           | 24,637         | 23.4          | 3,761         | 26.2               | 102,570        | 18.8                          | 1,219        | 17.2            | 1,159        |
| East South Central      | 4.0          | 20,864         | 3.7            | 3,816          | 2.0           | 327           | 4.2                | 16,413         | 2.4                           | 153          | 2.3             | 155          |



|                                                     | All patients |         | No opioid fill |        | Tramadol only |        | Other short-acting |         | Tramadol + other short-acting |       | Any long-acting |       |
|-----------------------------------------------------|--------------|---------|----------------|--------|---------------|--------|--------------------|---------|-------------------------------|-------|-----------------|-------|
|                                                     | col%         | N       | col%           | N      | col%          | N      | col%               | N       | col%                          | N     | col%            | N     |
| West South Central                                  | 12.0         | 62,728  | 10.1           | 10,384 | 23.6          | 3,797  | 12.1               | 47,272  | 14.9                          | 968   | 4.6             | 307   |
| Mountain                                            | 9.3          | 48,676  | 8.4            | 8,648  | 8.0           | 1,291  | 9.4                | 36,807  | 11.6                          | 751   | 17.5            | 1,179 |
| Pacific/Unk/Other                                   | 5.6          | 29,243  | 5.4            | 5,613  | 3.6           | 583    | 5.7                | 22,292  | 4.0                           | 260   | 7.4             | 495   |
| <b>Coverage type</b>                                |              |         |                |        |               |        |                    |         |                               |       |                 |       |
| Commercial                                          | 72.5         | 380,125 | 61.8           | 63,735 | 62.6          | 10,047 | 75.9               | 297,419 | 59.9                          | 3,886 | 74.8            | 5,038 |
| Medicare—aged                                       | 25.6         | 134,194 | 35.9           | 37,048 | 35.5          | 5,705  | 22.3               | 87,411  | 38.3                          | 2,484 | 23.0            | 1,546 |
| Medicare—disabled                                   | 1.9          | 9,999   | 2.3            | 2,334  | 1.9           | 307    | 1.8                | 7,092   | 1.7                           | 113   | 2.3             | 153   |
| <b>Surgery</b>                                      |              |         |                |        |               |        |                    |         |                               |       |                 |       |
| Carpal tunnel release                               | 8.1          | 42,264  | 11.3           | 11,631 | 9.2           | 1,480  | 7.4                | 29,023  | 1.7                           | 108   | 0.3             | 22    |
| Knee arthroscopic<br>minesectomy (scope)            | 19.9         | 104,125 | 17.1           | 17,661 | 13.7          | 2,194  | 21.2               | 82,879  | 9.2                           | 595   | 11.8            | 796   |
| Lap chole w/ and<br>w/out IOC                       | 23.5         | 123,262 | 24.4           | 25,182 | 22.7          | 3,650  | 24.0               | 93,928  | 7.1                           | 458   | 0.7             | 44    |
| Lap inguinal hernia<br>repair                       | 5.4          | 28,401  | 4.9            | 5,075  | 3.3           | 528    | 5.8                | 22,701  | 1.3                           | 81    | 0.2             | 16    |
| Lap low anterior<br>resection w/o or<br>w/out stoma | 0.3          | 1,525   | 0.5            | 476    | 0.4           | 70     | 0.3                | 972     |                               |       |                 |       |
| Lap nephrectomy<br>partial or total                 | 0.4          | 2,166   | 0.5            | 530    | 0.5           | 84     | 0.4                | 1,532   |                               |       |                 |       |
| Lap prostate w/ or<br>w/out robot                   | 1.9          | 10,042  | 1.7            | 1,798  | 4.3           | 696    | 1.9                | 7,509   |                               |       |                 |       |
| Lap/Robotic<br>hysterectomy                         | 0.7          | 3,642   | 1.0            | 1,010  | 0.7           | 115    | 0.6                | 2,489   |                               |       |                 |       |
| Lumbar laminotomy/<br>laminectomy<br>(posterior)    | 3.8          | 19,916  | 4.3            | 4,452  | 4.6           | 742    | 3.7                | 14,425  | 2.3                           | 150   | 2.2             | 147   |
| Lumpectomy w/ and<br>w/out SLNB                     | 4.0          | 20,958  | 5.5            | 5,680  | 6.3           | 1,003  | 3.6                | 14,191  | 1.1                           | 71    | 0.2             | 13    |
| Open Lung<br>Lobectomy                              | 0.2          | 983     | 0.2            | 198    | 0.2           | 38     | 0.2                | 707     | 0.3                           | 17    | 0.3             | 23    |
| Open inguinal hernia<br>repair                      | 9.4          | 49,209  | 8.3            | 8,511  | 5.3           | 851    | 10.1               | 39,626  | 3.0                           | 192   | 0.4             | 29    |

|                                                                    | All patients |        | No opioid fill |       | Tramadol only |       | Other short-acting |        | Tramadol + other short-acting |       | Any long-acting |       |
|--------------------------------------------------------------------|--------------|--------|----------------|-------|---------------|-------|--------------------|--------|-------------------------------|-------|-----------------|-------|
|                                                                    | col%         | N      | col%           | N     | col%          | N     | col%               | N      | col%                          | N     | col%            | N     |
| Parathyroidectomy                                                  | 1.3          | 6,817  | 2.8            | 2,929 | 1.1           | 177   | 0.9                | 3,702  |                               |       |                 |       |
| Partial colectomy w/<br>or w/out stoma                             | 0.4          | 2,250  | 0.8            | 835   | 0.4           | 62    | 0.3                | 1,344  |                               |       |                 |       |
| Rotator Cuff Surgery                                               | 5.0          | 26,185 | 3.3            | 3,407 | 2.0           | 323   | 5.3                | 20,634 | 5.2                           | 336   | 22.0            | 1,485 |
| Simple Mastectomy<br>w/out reconstruction                          | 1.1          | 5,595  | 1.6            | 1,658 | 1.2           | 197   | 0.9                | 3,699  | 0.4                           | 28    | 0.2             | 13    |
| TKA                                                                | 9.4          | 49,064 | 6.7            | 6,894 | 13.3          | 2,130 | 8.7                | 34,176 | 44.4                          | 2,876 | 44.4            | 2,988 |
| Total hip                                                          | 5.2          | 27,104 | 4.8            | 4,949 | 10.4          | 1,673 | 4.6                | 17,873 | 22.6                          | 1,466 | 17.0            | 1,143 |
| Other                                                              | 0.2          | 810    | 0.2            | 241   | 0.3           | 46    | 0.1                | 512    |                               |       |                 |       |
| Depression comorbidity                                             | 2.9          | 15,106 | 2.8            | 2,836 | 3.6           | 576   | 2.8                | 11,099 | 4.7                           | 305   | 4.3             | 290   |
| Obesity                                                            | 4.4          | 22,918 | 4.1            | 4,203 | 5.4           | 867   | 4.2                | 16,423 | 11.9                          | 773   | 9.7             | 652   |
| Diagnosis of Rheumatoid<br>Arthritis or other collagen<br>disorder | 1.3          | 6,844  | 1.5            | 1,591 | 2.0           | 322   | 1.2                | 4,641  | 2.3                           | 148   | 2.1             | 142   |

## Appendix F: Complete regression results

|                                              | CONSORT<br>chronic opioid<br>dependence | Persistent opioid<br>use after surgery | Additional opioid use<br>after surgery |
|----------------------------------------------|-----------------------------------------|----------------------------------------|----------------------------------------|
| Post-surgery opioid category                 |                                         |                                        |                                        |
| Any long-acting opioid                       | 1.709<br>[1.397,2.090]                  | 1.191<br>[1.029,1.377]                 | 0.945<br>[0.861,1.036]                 |
| Tramadol only                                | 1.424<br>[1.120,1.811]                  | 1.499<br>[1.283,1.751]                 | 1.071<br>[1.002,1.144]                 |
| Tramadol plus another<br>short-acting opioid | 1.408<br>[1.094,1.813]                  | 1.038<br>[0.870,1.238]                 | 1.057<br>[0.962,1.162]                 |
| Non-tramadol short-acting<br>opioid only     | Ref                                     | Ref                                    | Ref                                    |
| Year                                         |                                         |                                        |                                        |
| YR=2009                                      | Ref                                     | Ref                                    | Ref                                    |
| YR=2010                                      | 0.985<br>[0.843,1.152]                  | 0.952<br>[0.850,1.067]                 | 0.934<br>[0.893,0.977]                 |
| YR=2011                                      | 0.615<br>[0.512,0.739]                  | 0.738<br>[0.651,0.837]                 | 0.626<br>[0.595,0.658]                 |
| YR=2012                                      | 0.605<br>[0.504,0.726]                  | 0.665<br>[0.585,0.755]                 | 0.621<br>[0.590,0.653]                 |
| YR=2013                                      | 0.604<br>[0.503,0.725]                  | 0.634<br>[0.557,0.721]                 | 0.586<br>[0.557,0.617]                 |
| YR=2014                                      | 0.509<br>[0.418,0.620]                  | 0.638<br>[0.560,0.728]                 | 0.532<br>[0.504,0.562]                 |
| YR=2015                                      | 0.415<br>[0.338,0.509]                  | 0.496<br>[0.433,0.568]                 | 0.493<br>[0.467,0.520]                 |
| YR=2016                                      | 0.365<br>[0.299,0.446]                  | 0.43<br>[0.376,0.492]                  | 0.466<br>[0.442,0.491]                 |
| YR=2017                                      | 0.273<br>[0.224,0.332]                  | 0.357<br>[0.314,0.406]                 | 0.524<br>[0.500,0.550]                 |
| Surgery                                      |                                         |                                        |                                        |
| Carpal tunnel release                        | Ref                                     | Ref                                    | Ref                                    |
| Knee arthroscopic                            | 0.489                                   | 0.602                                  | 0.689                                  |

|                                               | CONSORT                   |                                     |                                     |
|-----------------------------------------------|---------------------------|-------------------------------------|-------------------------------------|
|                                               | chronic opioid dependence | Persistent opioid use after surgery | Additional opioid use after surgery |
| minesectomy (scope)                           |                           |                                     |                                     |
|                                               | [0.382,0.626]             | [0.504,0.718]                       | [0.653,0.727]                       |
| Lap chole w/ and w/out IOC                    | 0.504                     | 0.456                               | 0.639                               |
|                                               | [0.399,0.637]             | [0.382,0.545]                       | [0.607,0.674]                       |
| Lap inguinal hernia repair                    | 0.444                     | 0.347                               | 0.535                               |
|                                               | [0.301,0.653]             | [0.251,0.480]                       | [0.494,0.581]                       |
| Lap low anterior resection w/o or w/out stoma | 1.953                     | 2.493                               | 1.028                               |
|                                               | [0.950,4.014]             | [1.521,4.085]                       | [0.810,1.305]                       |
| Lap nephrectomy partial or total              | 1.56                      | 1.423                               | 0.723                               |
|                                               | [0.829,2.938]             | [0.868,2.332]                       | [0.586,0.890]                       |
| Lap prostate w/ or w/out robot                | 0.338                     | 0.413                               | 0.476                               |
|                                               | [0.189,0.605]             | [0.275,0.620]                       | [0.423,0.536]                       |
| Lap/Robotic hysterectomy                      | 0.895                     | 1.026                               | 0.813                               |
|                                               | [0.451,1.778]             | [0.644,1.634]                       | [0.694,0.954]                       |
| Lumbar laminotomy/laminectomy (posterior)     | 2.143                     | 2.398                               | 1.032                               |
|                                               | [1.644,2.793]             | [1.980,2.904]                       | [0.957,1.112]                       |
| Lumpectomy w/ and w/out SLNB                  | 0.75                      | 0.802                               | 0.887                               |
|                                               | [0.523,1.074]             | [0.619,1.038]                       | [0.822,0.956]                       |
| Open Lung Lobectomy                           | 3.348                     | 3.7                                 | 1.109                               |
|                                               | [1.979,5.665]             | [2.506,5.462]                       | [0.878,1.401]                       |
| Open inguinal hernia repair                   | 0.535                     | 0.522                               | 0.557                               |
|                                               | [0.399,0.718]             | [0.417,0.653]                       | [0.521,0.595]                       |
| Parathyroidectomy                             | 0.649                     | 0.629                               | 0.649                               |
|                                               | [0.340,1.241]             | [0.388,1.019]                       | [0.563,0.748]                       |
| Partial colectomy w/ or w/out stoma           | 2.199                     | 2.701                               | 1.094                               |
|                                               | [1.267,3.819]             | [1.843,3.958]                       | [0.905,1.324]                       |
| Rotator Cuff Surgery                          | 1.084                     | 1.992                               | 0.926                               |
|                                               | [0.821,1.431]             | [1.656,2.395]                       | [0.864,0.993]                       |
| Simple Mastectomy w/out reconstruction        | 1.448                     | 1.759                               | 1.21                                |
|                                               | [0.913,2.296]             | [1.285,2.408]                       | [1.076,1.360]                       |
| TKA                                           | 1.448                     | 1.759                               | 1.21                                |
|                                               | [0.913,2.296]             | [1.285,2.408]                       | [1.076,1.360]                       |

|                    | CONSORT<br>chronic opioid<br>dependence | Persistent opioid<br>use after surgery | Additional opioid use<br>after surgery |
|--------------------|-----------------------------------------|----------------------------------------|----------------------------------------|
| Total hip          | 0.819<br>[0.607,1.104]                  | 1.129<br>[0.922,1.382]                 | 0.663<br>[0.615,0.715]                 |
| VATS Wedge         | 0.819<br>[0.607,1.104]                  | 1.129<br>[0.922,1.382]                 | 0.663<br>[0.615,0.715]                 |
| Whipple, open      |                                         | 0.886<br>[0.126,6.226]                 | 0.888<br>[0.446,1.766]                 |
| Female             | 1.067<br>[0.960,1.186]                  | 1.186<br>[1.106,1.272]                 | 1.22<br>[1.185,1.255]                  |
| Insurance group    |                                         |                                        |                                        |
| Commercial         | Ref                                     | Ref                                    | Ref                                    |
| Aged Medicare      | 1.092<br>[0.845,1.413]                  | 1.132<br>[0.957,1.339]                 | 0.96<br>[0.895,1.030]                  |
| Disabled Medicare  | 3.426<br>[2.799,4.194]                  | 2.733<br>[2.357,3.170]                 | 1.879<br>[1.743,2.025]                 |
| Race/Ethnicity     |                                         |                                        |                                        |
| White              | Ref                                     | Ref                                    | Ref                                    |
| Black              | 1.155<br>[0.986,1.353]                  | 1.456<br>[1.316,1.611]                 | 1.247<br>[1.195,1.302]                 |
| Hispanic           | 0.77<br>[0.623,0.951]                   | 1.072<br>[0.943,1.218]                 | 0.982<br>[0.936,1.030]                 |
| Asian              | 0.873<br>[0.605,1.259]                  | 0.946<br>[0.738,1.212]                 | 0.797<br>[0.723,0.880]                 |
| Unk/other          | 0.873<br>[0.605,1.259]                  | 0.946<br>[0.738,1.212]                 | 0.797<br>[0.723,0.880]                 |
| Census Division    |                                         |                                        |                                        |
| New England        | Ref                                     | Ref                                    | Ref                                    |
| Mid Atlantic       | 1.116<br>[0.752,1.657]                  | 1.03<br>[0.797,1.332]                  | 0.943<br>[0.859,1.035]                 |
| East North Central | 1.566<br>[1.125,2.180]                  | 1.495<br>[1.208,1.849]                 | 1.292<br>[1.196,1.397]                 |
| West North Central | 1.538<br>[1.100,2.150]                  | 1.279<br>[1.028,1.591]                 | 1.239<br>[1.144,1.342]                 |
| South Atlantic     | 1.828<br>[1.320,2.530]                  | 1.576<br>[1.278,1.943]                 | 1.376<br>[1.275,1.485]                 |
| East South Central | 1.909<br>[1.307,2.787]                  | 1.829<br>[1.429,2.342]                 | 1.619<br>[1.476,1.776]                 |
| West South Central | 1.869                                   | 1.873                                  | 1.672                                  |

|                                         | CONSORT<br>chronic opioid<br>dependence | Persistent opioid<br>use after surgery | Additional opioid use<br>after surgery |
|-----------------------------------------|-----------------------------------------|----------------------------------------|----------------------------------------|
| Mountain                                | [1.325,2.637]<br>1.576                  | [1.503,2.335]<br>1.399                 | [1.544,1.812]<br>1.352                 |
| Pacific                                 | [1.113,2.230]<br>1.765                  | [1.117,1.752]<br>1.381                 | [1.244,1.469]<br>1.195                 |
| Unk/Other                               | [1.214,2.566]<br>5.109                  | [1.076,1.771]<br>2.955                 | [1.089,1.310]<br>1.685                 |
| Age group                               | [2.184,11.95]                           | [1.484,5.886]                          | [1.233,2.303]                          |
| 18-24                                   | Ref                                     | Ref                                    | Ref                                    |
| 25-34                                   | 5.684<br>[2.285,14.14]                  | 5.982<br>[3.033,11.80]                 | 1.101<br>[1.005,1.206]                 |
| 35-44                                   | 6.648<br>[2.727,16.21]                  | 6.987<br>[3.598,13.57]                 | 1.155<br>[1.062,1.256]                 |
| 45-54                                   | 9.187<br>[3.798,22.23]                  | 9.458<br>[4.897,18.27]                 | 1.277<br>[1.178,1.384]                 |
| 55-64                                   | 7.425<br>[3.065,17.99]                  | 8.468<br>[4.382,16.37]                 | 1.271<br>[1.172,1.378]                 |
| 65-74                                   | 5.976<br>[2.399,14.88]                  | 6.707<br>[3.414,13.17]                 | 1.292<br>[1.168,1.430]                 |
| 75-84                                   | 4.416<br>[1.733,11.25]                  | 5.26<br>[2.647,10.45]                  | 1.169<br>[1.043,1.310]                 |
| 85+                                     | 5.242<br>[1.535,17.90]                  | 5.584<br>[2.376,13.12]                 | 1.024<br>[0.820,1.280]                 |
| Discharge opioid prescription<br>volume |                                         |                                        |                                        |
| 1-199 MME                               | 1<br>[1,1]                              | 1<br>[1,1]                             | 1<br>[1,1]                             |
| 200-299 MME                             | 1.064<br>[0.903,1.255]                  | 1.147<br>[1.018,1.292]                 | 1.027<br>[0.991,1.064]                 |
| 300-399 MME                             | 1.304<br>[1.101,1.544]                  | 1.386<br>[1.229,1.562]                 | 1.056<br>[1.016,1.099]                 |
| 400-499 MME                             | 1.32<br>[1.088,1.603]                   | 1.562<br>[1.369,1.783]                 | 1.099<br>[1.047,1.153]                 |
| 500+ MME                                | 1.588<br>[1.309,1.926]                  | 1.876<br>[1.648,2.136]                 | 1.196<br>[1.138,1.257]                 |
| Elixhauser comorbidities                |                                         |                                        |                                        |
| CHF                                     | 0.731<br>[0.477,1.122]                  | 0.912<br>[0.698,1.191]                 | 1.214<br>[1.087,1.355]                 |
| ARRHYTHMIA                              | 1.005                                   | 0.987                                  | 1.07                                   |

|                   | CONSORT<br>chronic opioid<br>dependence | Persistent opioid<br>use after surgery | Additional opioid use<br>after surgery |
|-------------------|-----------------------------------------|----------------------------------------|----------------------------------------|
| VALVULAR          | [0.810,1.248]<br>0.969                  | [0.855,1.140]<br>0.96                  | [1.003,1.141]<br>0.948                 |
| PULM_CIRC         | [0.662,1.420]<br>1.596                  | [0.744,1.239]<br>1.277                 | [0.845,1.065]<br>1.236                 |
| PERIPH_VASC       | [0.959,2.653]<br>1.645                  | [0.876,1.861]<br>1.333                 | [1.025,1.489]<br>1.266                 |
| HTN_UNCOMP        | [1.151,2.349]<br>1.132                  | [1.029,1.726]<br>1.181                 | [1.124,1.426]<br>1.135                 |
| HTN_COMP          | [1.008,1.270]<br>1.305                  | [1.093,1.275]<br>1.103                 | [1.098,1.172]<br>1.004                 |
| OTH_NEURO         | [0.917,1.857]<br>1.45                   | [0.868,1.402]<br>1.302                 | [0.894,1.127]<br>1.093                 |
| CHRON_PULM        | [0.999,2.106]<br>1.527                  | [0.991,1.711]<br>1.534                 | [0.960,1.244]<br>1.308                 |
| PEP_ULCER         | [1.297,1.799]<br>2.741                  | [1.372,1.714]<br>2.573                 | [1.238,1.382]<br>1.292                 |
| DM_WO_CC          | [1.313,5.719]<br>1.237                  | [1.502,4.408]<br>1.283                 | [0.965,1.728]<br>1.229                 |
| DM_W_CC           | [1.070,1.430]<br>1.152                  | [1.166,1.412]<br>1.05                  | [1.176,1.285]<br>1.156                 |
| PARALYSIS         | [0.854,1.552]<br>0.963                  | [0.862,1.279]<br>1.13                  | [1.058,1.262]<br>1.05                  |
| RENAL             | [0.316,2.933]<br>0.816                  | [0.528,2.418]<br>1.008                 | [0.733,1.504]<br>1.077                 |
| LIVER             | [0.550,1.213]<br>1.525                  | [0.786,1.292]<br>1.606                 | [0.963,1.205]<br>1.118                 |
| RHEUM_ARTH_COLL   | [1.084,2.144]<br>1.168                  | [1.258,2.050]<br>1.228                 | [1.010,1.239]<br>1.368                 |
| HYPOTHYROID       | [0.858,1.589]<br>1.004                  | [1.003,1.503]<br>1.01                  | [1.246,1.503]<br>1.028                 |
| COAGULOPATHY      | [0.838,1.203]<br>1.648                  | [0.897,1.137]<br>1.245                 | [0.972,1.087]<br>1.2                   |
| OBESITY           | [1.133,2.399]<br>1.047                  | [0.935,1.657]<br>1.076                 | [1.037,1.388]<br>1.116                 |
| FLUID_ELECTROLYTE | [0.881,1.244]<br>1.326                  | [0.961,1.205]<br>1.301                 | [1.056,1.181]<br>1.077                 |
| BLOOD_LOSS_ANEMIA | [1.055,1.667]<br>1.255                  | [1.114,1.520]<br>1.111                 | [0.995,1.166]<br>1.207                 |
| DEFICIENCY_ANEMIA | [0.703,2.240]<br>1.43                   | [0.738,1.672]<br>1.459                 | [0.972,1.498]<br>1.156                 |

|            | CONSORT<br>chronic opioid<br>dependence | Persistent opioid<br>use after surgery | Additional opioid use<br>after surgery |
|------------|-----------------------------------------|----------------------------------------|----------------------------------------|
| ALCOHOL    | [0.957,2.135]<br>1.705                  | [1.110,1.917]<br>1.831                 | [1.007,1.327]<br>1.477                 |
| DRUG_ABUSE | [1.034,2.814]<br>3.442                  | [1.275,2.631]<br>2.118                 | [1.227,1.779]<br>1.47                  |
| PSYCHOSIS  | [1.918,6.178]<br>0.792                  | [1.264,3.550]<br>0.67                  | [1.110,1.947]<br>0.848                 |
| DEPRESSION | [0.316,1.985]<br>1.868                  | [0.321,1.400]<br>1.526                 | [0.626,1.149]<br>1.41                  |
|            | [1.560,2.236]<br>N                      | [1.337,1.742]<br>357,794               | [1.322,1.503]<br>357,884               |

Exponentiated coefficients; 95% confidence intervals in brackets
